# Supplementary material for: First Glance of Molecular Profile of Atypical Cellular Angiofibroma/Cellular Angiofibroma with Sarcomatous Transformation by Next Generation Sequencing
Source: PubMed Central journal article supplement (PMC7169459; doi:10.3390/diagnostics10010035), 2020-01-09
Supplement: diagnostics-10-00035-s001.pdf [file diagnostics-10-00035-s001.pdf]

**Figure S1:** Immunohistochemical and fluorescence in situ hybridization(FISH) result of six cases of atypical angiofibroma/angiofibroma with sarcomatous transformation and two cellular angiofibroma control cases.

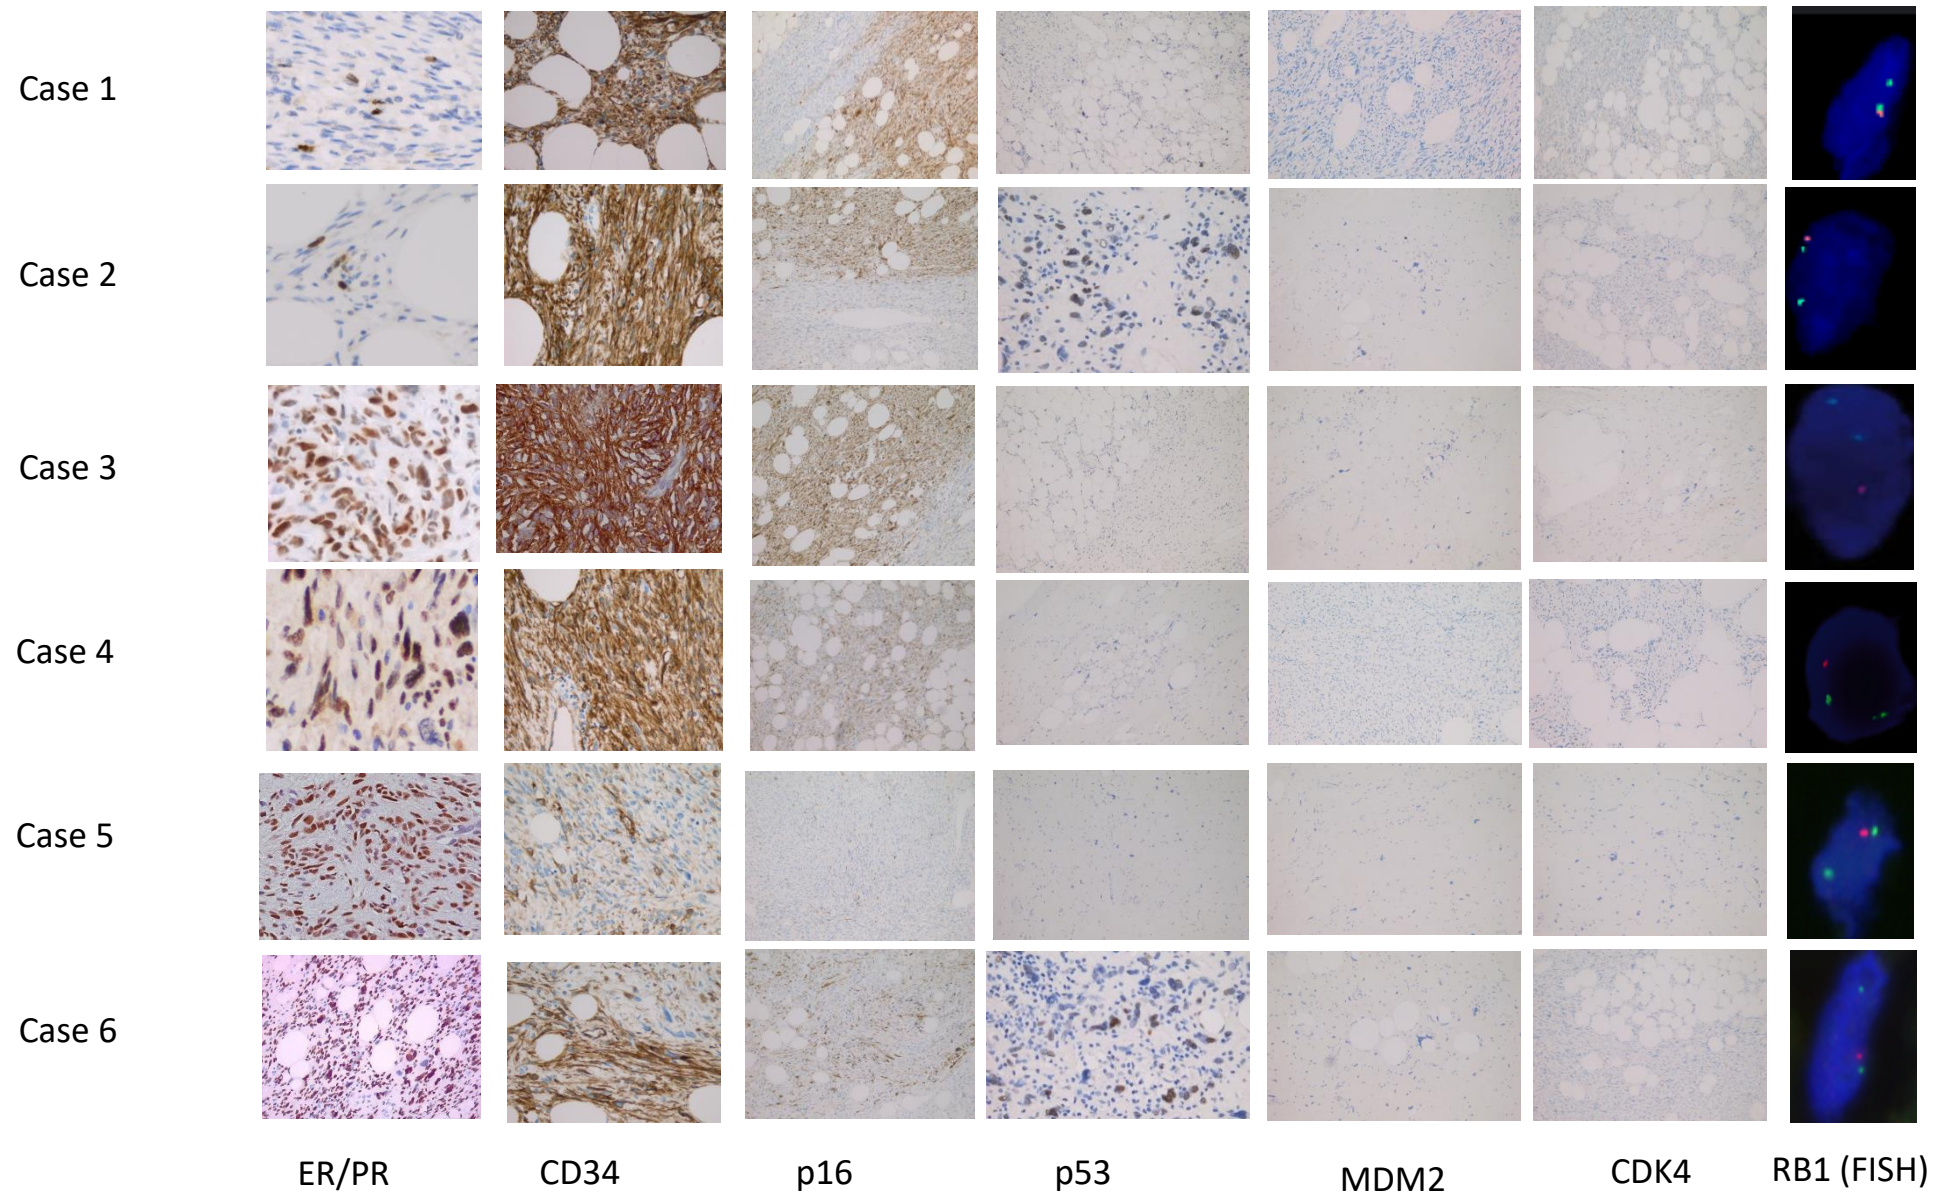

Control Case 1

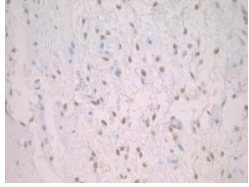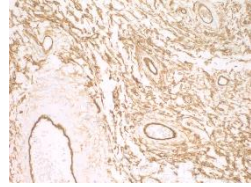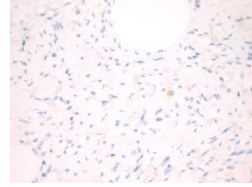

Not performed

Not performed

Not performed

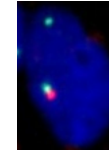

Control Case 2

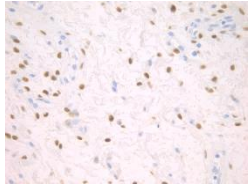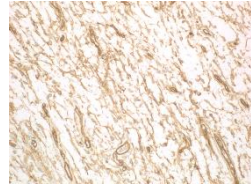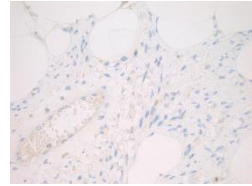

Not performed

Not performed

Not performed

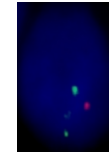

ER/PR

CD34

p16

P53

MDM2

CDK4

RB1 (FISH)
